# Supplementary material
Source: MDPI journal article supplement (https://www.mdpi.com/2073-4441/15/24/4238)
Supplement: s1 [file s1]

## **SUPPLEMENTARY MATERIAL**

# **Patterns and Predictors of Phytoplankton Assemblage Structure in a Coastal Lagoon: Species-Specific Analysis Needed to Disentangle Anthropogenic Pressures from Ocean Processes**

Maria João Lima, Ana B. Barbosa, Alexandra Cravo, Cátia Correia, André Matos

Centre for Marine and Environmental Research (CIMA), ARNET—Aquatic Research Network, Universidade do Algarve, Campus of Gambelas, 8005-139 Faro, Portugal.

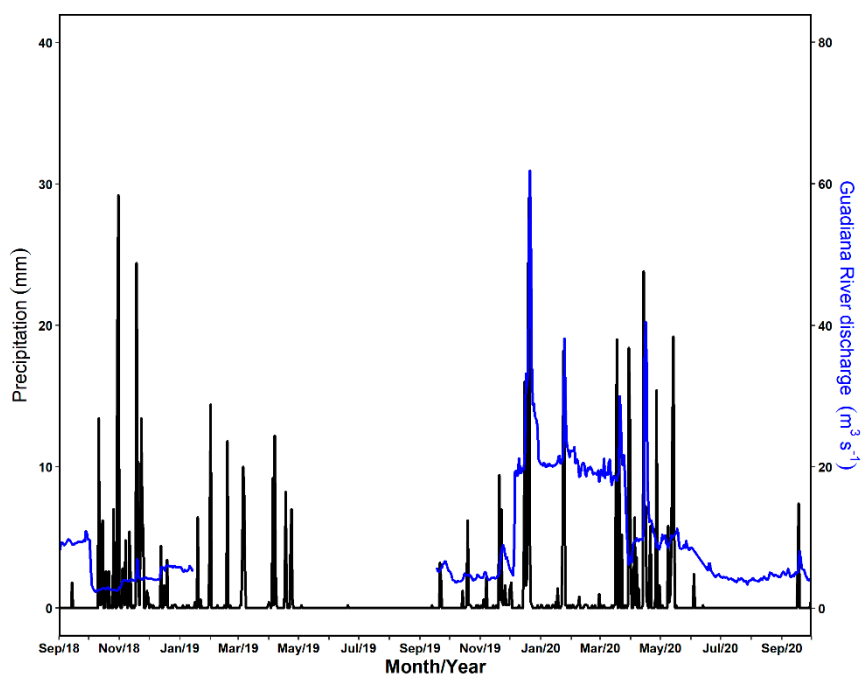

**Supplementary Figure S1** – Daily time series of rainfall precipitation (left y-axis), measured at Tavira land-based meteorological station (Source: Direção Regional de Agricultura e Pescas do Algarve, <https://www.drapalg.min-agricultura.pt/>), and Guadiana River discharge (right y-axis), measured at the hydrometric station Pulo do Lobo (Source: Portuguese Environmental Agency, <http://snirh.apambiente.pt/>), during the period September 2018 - September 2020.

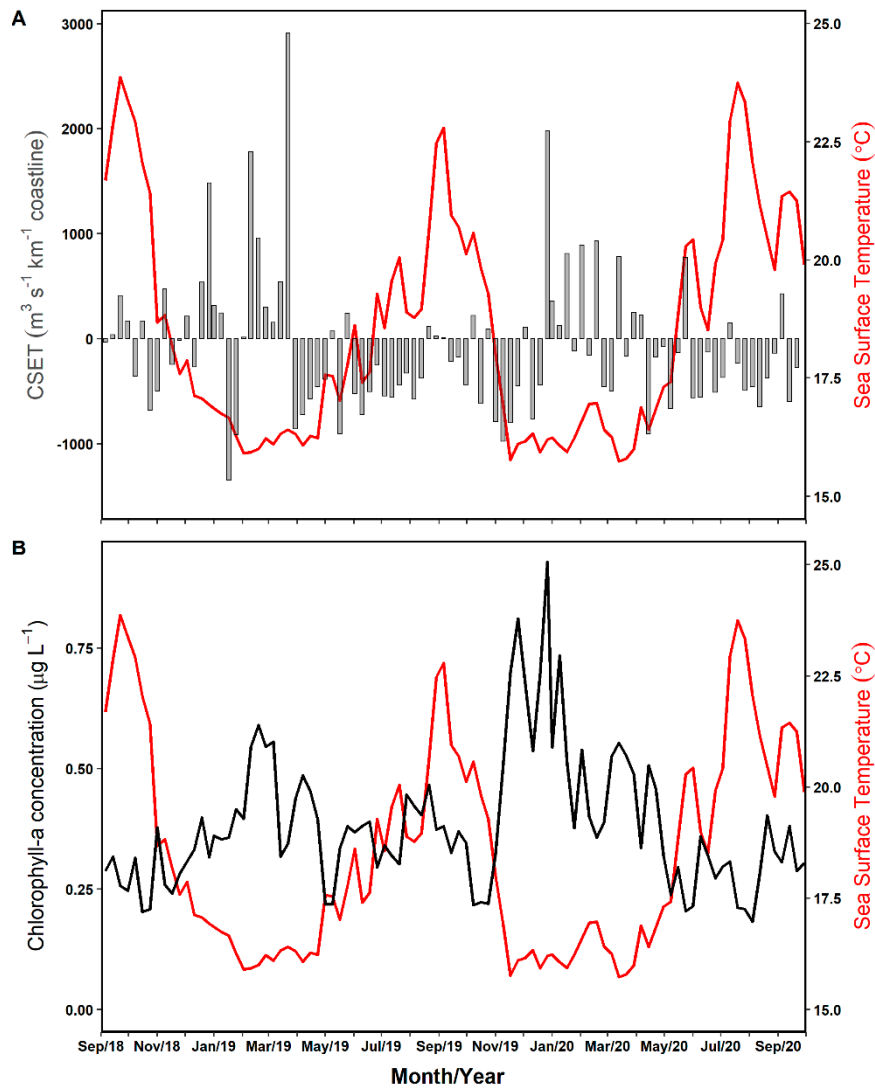

**Supplementary Figure S2** – Weekly (8-day) mean time series of selected oceanographic variables in the coastal region adjacent to the Tavira inlet, for the period September 2018 - September 2020. **(A)** Cross-shore Ekman transport (CSET; left y-axis), a wind-based upwelling index, and sea surface temperature (SST; right y-axis); and **(B)** Chlorophyll-a concentration (Chl-a; left y-axis) and SST (right y-axis). Negative and positive CSET values represent upwelling-favourable, and downwelling-favourable conditions, respectively. See Figure 1 for the location of the site used to derive CSET, and the coastal area used to extract Chl-a and SST data.

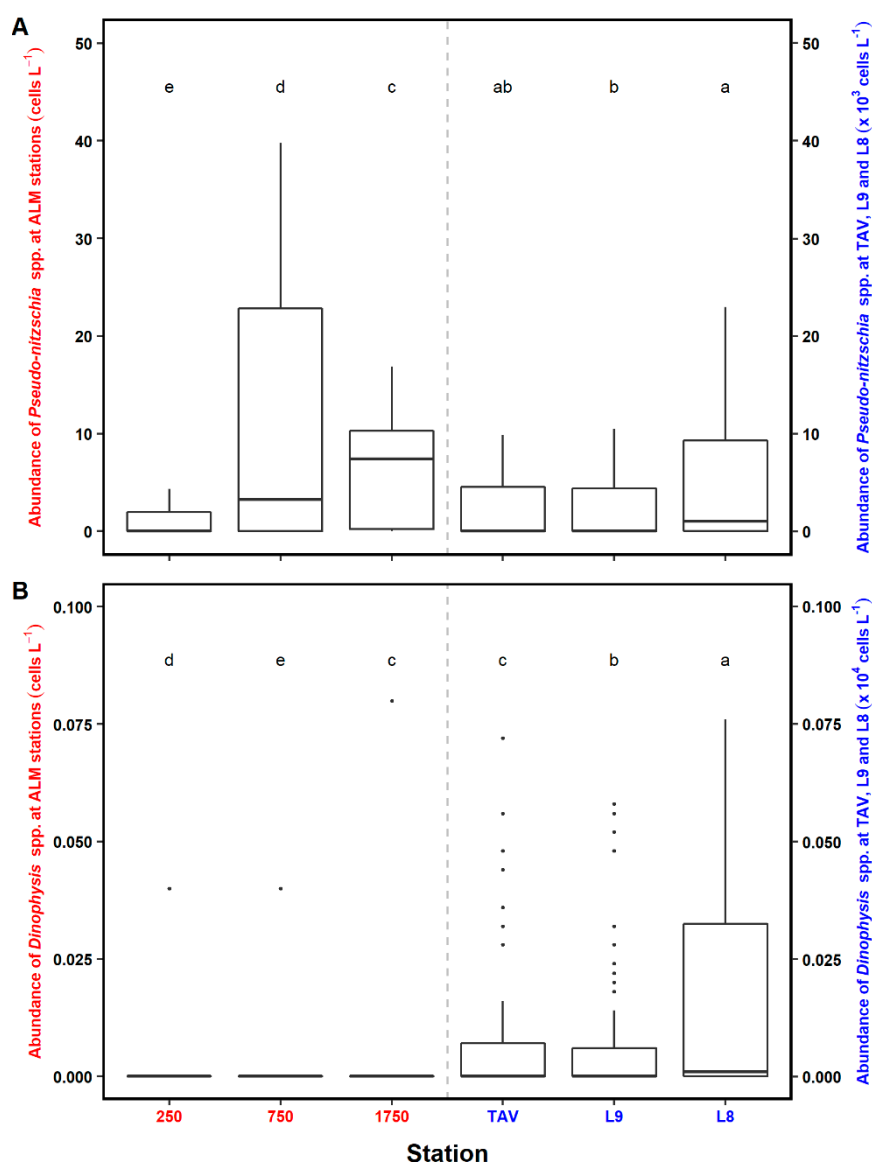

**Supplementary Figure S3** – Distribution of the abundance of **(A)** *Pseudo-nitzschia* spp. and **(B)** *Dinophysis* spp. in different sampling stations in the Ria Formosa lagoon, and in classified lagoonal (TAV) and coastal (L8, L9) shellfish production areas, during the period September 2018 - September 2020. Lagoon stations are located at 250 m (ALM 250), 750 m (ALM 750), and 1750 m (ALM 1750) from the discharge point of the Almargem wastewater treatment plant (WWTP). Median values are identified by the central line within the box, the bottom and top edges of the box indicate the 25th and 75th percentiles, respectively, and the whiskers represent non-outlier limits. For each phytoplankton group, different uppercase letters above the bars denote significant differences between stations/areas ( $p < 0.05$ ), with abundances decreasing (higher - lower) in alphabetical order (a - e). Note differences in scale for lagoon stations (red left y-axis) and shellfish production areas (blue right y-axis). See Fig. 1 for the location of sampling stations in the Ria Formosa lagoon and adjacent coastal area.

**Supplementary Table S1** – General statistical information, including mean, standard deviation (SD), minimum (Min) and maximum (Max) values, and number of samples (N), for meteorological, hydrological, and oceanographic variables, during the period September 2018 - September 2020. Information on the effluents discharged by the Almargem wastewater treatment plant, including monthly average effluent discharge rate, and total nitrogen and phosphorus loads, was provided by Águas do Algarve (AdA), the water supply company. \* Data only available after July 2019.

| Variable                                                                                   | Mean $\pm$ SD          | Min - Max        | N   |
|--------------------------------------------------------------------------------------------|------------------------|------------------|-----|
| Rainfall precipitation (mm d <sup>-1</sup> )                                               | 0.9 $\pm$ 3.3          | 0.0 – 29.2       | 761 |
| Almargem Stream discharge (m <sup>3</sup> s <sup>-1</sup> )*                               | 0.000249 $\pm$ 0.00339 | 0.0 – 0.05       | 441 |
| Guadiana River discharge (m <sup>3</sup> s <sup>-1</sup> )                                 | 9.7 $\pm$ 8.1          | 2.3 – 61.9       | 496 |
| Effluent discharge rate (m <sup>3</sup> d <sup>-1</sup> )                                  | 4092.6 $\pm$ 862.0     | 2512.6 – 6374.5  | 25  |
| Effluent total nitrogen load (kg N d <sup>-1</sup> )                                       | 33.10 $\pm$ 26.95      | 10.98 – 127.46   | 25  |
| Effluent total phosphorus load (kg P d <sup>-1</sup> )                                     | 15.38 $\pm$ 10.47      | 2.66 – 46.98     | 25  |
| Sea surface temperature (°C)                                                               | 18.5 $\pm$ 2.3         | 15.7 – 23.9      | 95  |
| Cross-shore Ekman Transport<br>(m <sup>3</sup> s <sup>-1</sup> km <sup>-1</sup> coastline) | -96.6 $\pm$ 662.5      | -1346.6 – 2907.9 | 96  |

**Supplementary Table S2** – General statistical information, including mean, standard deviation (SD), minimum (Min) and maximum (Max) values, and number of samples (N) for different water physical-chemical variables evaluated in three sampling stations in the Ria Formosa lagoon, during the period September 2018 - September 2020. Stations are located at 250 m (ALM 250), 750 m (ALM 750), and 1750 m (ALM 1750) from the discharge point of the Almargem wastewater treatment plant. Significant differences between ALM stations ( $p < 0.05$ ), tested by Durbin's rank test, followed by post-hoc pairwise comparisons, are also included.

| Variable                                      | Station | Mean $\pm$ SD    | Min - Max    | N  | Differences between (ALM) stations |
|-----------------------------------------------|---------|------------------|--------------|----|------------------------------------|
| Temperature ( $^{\circ}\text{C}$ )            | 250     | $22.8 \pm 4.8$   | 14.4 – 30.6  | 20 | 250 > 750 > 1750                   |
|                                               | 750     | $22.3 \pm 4.6$   | 13.9 – 29.5  | 19 |                                    |
|                                               | 1750    | $20.8 \pm 4.1$   | 13.2 – 27.9  | 19 |                                    |
| Salinity                                      | 250     | $28.0 \pm 5.1$   | 9.3 – 32.2   | 20 | 250 < 750 < 1750                   |
|                                               | 750     | $32.0 \pm 3.3$   | 19.4 – 34.8  | 19 |                                    |
|                                               | 1750    | $36.3 \pm 0.7$   | 34.6 – 37.4  | 19 |                                    |
| pH                                            | 250     | $8.0 \pm 0.3$    | 7.7 – 9.0    | 20 | 250 < 1750                         |
|                                               | 750     | $8.1 \pm 0.2$    | 7.7 – 8.8    | 19 |                                    |
|                                               | 1750    | $8.1 \pm 0.1$    | 7.8 – 8.2    | 19 |                                    |
| Dissolved Oxygen ( $\text{mg L}^{-1}$ )       | 250     | $10.3 \pm 3.6$   | 6.0 – 23.3   | 20 | 250 > 750 and 1750                 |
|                                               | 750     | $9.6 \pm 3.1$    | 4.5 – 19.5   | 19 |                                    |
|                                               | 1750    | $8.4 \pm 0.7$    | 6.4 – 9.6    | 19 |                                    |
| Dissolved Oxygen (% sat.)                     | 250     | $143.3 \pm 62.2$ | 79.1 – 363.9 | 20 | 250 > 750 and 1750                 |
|                                               | 750     | $135.3 \pm 50.9$ | 67.8 – 302.0 | 19 |                                    |
|                                               | 1750    | $117.0 \pm 11.2$ | 89.8 – 135.4 | 19 |                                    |
| Total Suspended Solids ( $\text{mg L}^{-1}$ ) | 250     | $12.3 \pm 5.3$   | 2.7 – 20.2   | 20 | 250 and 750 > 1750                 |
|                                               | 750     | $13.8 \pm 11.3$  | 1.9 – 53.3   | 19 |                                    |
|                                               | 1750    | $6.5 \pm 3.9$    | 0.7 – 17.6   | 19 |                                    |
| Ammonium ( $\mu\text{M}$ )                    | 250     | $25.1 \pm 34.5$  | 0.7 – 124.6  | 20 | 250 > 750 > 1750                   |
|                                               | 750     | $9.7 \pm 12.4$   | 0.1 – 42.2   | 19 |                                    |
|                                               | 1750    | $0.7 \pm 0.7$    | 0.1 – 2.7    | 19 |                                    |
| Nitrate ( $\mu\text{M}$ )                     | 250     | $10.0 \pm 5.7$   | 0.9 – 22.5   | 20 | 250 > 750 > 1750                   |
|                                               | 750     | $6.1 \pm 3.8$    | 0.5 – 14.7   | 19 |                                    |
|                                               | 1750    | $0.7 \pm 0.9$    | 0.04 – 4.2   | 19 |                                    |
| Nitrite ( $\mu\text{M}$ )                     | 250     | $3.4 \pm 2.4$    | 0.8 – 9.0    | 20 | 250 > 750 > 1750                   |

|                             |      |                 |              |    |                    |
|-----------------------------|------|-----------------|--------------|----|--------------------|
|                             | 750  | $1.8 \pm 1.2$   | $0.05 - 4.1$ | 19 |                    |
|                             | 1750 | $0.1 \pm 0.1$   | $0.01 - 0.3$ | 19 |                    |
| Phosphate ( $\mu\text{M}$ ) | 250  | $13.1 \pm 8.7$  | $1.8 - 33.7$ | 20 |                    |
|                             | 750  | $6.8 \pm 4.3$   | $1.6 - 15.7$ | 19 | $250 > 750 > 1750$ |
|                             | 1750 | $0.3 \pm 0.2$   | $0 - 0.6$    | 19 |                    |
| Silicate ( $\mu\text{M}$ )  | 250  | $37.6 \pm 19.2$ | $0.5 - 97.1$ | 20 |                    |
|                             | 750  | $24.7 \pm 12.5$ | $0.4 - 62.0$ | 19 | $250 > 750 > 1750$ |
|                             | 1750 | $3.3 \pm 1.5$   | $0.4 - 5.9$  | 19 |                    |

**Supplementary Table S3** – List of phytoplankton operational taxonomic units (OTUs), identified to the lowest possible taxonomic level, detected in the Ria Formosa lagoon, during the period September 2018 - September 2020. Sampling stations are located at 250 m (ALM 250), 750 m (ALM 750), and 1750 m (ALM 1750) from the discharge point of the Almargem wastewater treatment plant. OTUs are organized alphabetically, within each phylum and class. Taxonomic and nomenclatural information according with AlgaeBase, accessed on 2023-11-02 [92]. Black circle symbol denotes OTUs present in more than 5% of samples. ‘B’ and ‘FW’ after selected OTUs represent benthic/tychoplanktonic and freshwater habitats, respectively. Potentially harmful species and harmful effects are also included, as follows: (a) potentially harmful but not toxigenic; (b) toxic to aquatic biota (including marine living resources); and (c) toxic to humans. Taxa not identified to the species level may also include potentially toxigenic genera (Cyanophyceae: *Oscillatoria/Planktothrix*; *Phormidium*; Dinophyceae: *Alexandrium*, *Amphidinium*, *Cochlodinium*, *Gonyaulax*, *Heterocapsa*, *Karenia*, *Margalefidinium*, *Ostreopsis*, *Scirpsiella*). Information sources for HAB effects: [5,93].

| Operational Taxonomic Unit                            | HAB<br>Effects | ALM Stations |     |      |
|-------------------------------------------------------|----------------|--------------|-----|------|
|                                                       |                | 250          | 750 | 1750 |
| PHYLUM CHAROPHYTA                                     |                |              |     |      |
| Class Zygnematophyceae                                |                |              |     |      |
| <i>Closterium</i> sp. Nitzsch ex Ralfs, 1848•FW       |                | x            | x   |      |
| PHYLUM CHLOROPHYTA                                    |                |              |     |      |
| Class Chlorophyceae                                   |                |              |     |      |
| <i>Golenkinia</i> sp. Chodat, 1894 FW                 |                |              | x   | x    |
| <i>Hafniomonas</i> sp. Ettl & Moestrup, 1980 FW       | x              |              |     | x    |
| <i>Monoraphidium</i> sp. Komárková-Legnerová, 1969•FW | x              | x            |     | x    |
| <i>Pediastrum</i> spp. Meyen, 1829 FW                 | x              |              |     |      |
| <i>Scenedesmus</i> spp. Meyen, 1829 FW                | x              |              |     |      |
| Unidentified forms•                                   | x              | x            |     | x    |
| Class Trebouxiophyceae                                |                |              |     |      |
| <i>Closteriopsis</i> Lemmermann, 1899 FW              | x              |              |     |      |
| Unidentified Chlorophytes                             |                |              |     |      |
| Morphotype 1•                                         | x              | x            |     | x    |
| Morphotype 2                                          | x              |              |     |      |
| Class Pyramimonadophyceae                             |                |              |     |      |
| <i>Pterosperma</i> sp. Pouchet, 1893                  |                |              |     | x    |
| PHYLUM CRYPTISTA                                      |                |              |     |      |
| Class Cryptophyceae                                   |                |              |     |      |
| Unidentified forms < 10 µm•                           | x              | x            |     | x    |
| Unidentified forms > 10 µm•                           | x              | x            |     | x    |
| PHYLUM CYANOBACTERIOTA                                |                |              |     |      |



### Class Cyanophyceae

|                                                                                                           |      |   |   |   |
|-----------------------------------------------------------------------------------------------------------|------|---|---|---|
| <i>Arthrospira</i> sp. Sitzenberger ex Gomont, 1892 / <i>Spirulina</i> sp. Turpin ex Gomont, 1892         |      | x | x |   |
| <i>Komvophoron</i> sp. K.Anagnostidis & J.Komárek, 1988 B FW                                              |      | x |   |   |
| <i>Merismopedia</i> spp. Meyen, 1839•                                                                     |      | x | x | x |
| <i>Oscillatoria</i> spp. Vaucher ex Gomont, 1892 / <i>Planktothrix</i> spp. Anagnostidis & Komárek, 1988• |      | x | x |   |
| <i>Phormidium</i> spp. Kützing ex Gomont, 1892 B FW                                                       | b, c | x | x |   |
| Unidentified forms of the order Oscillatoriales•                                                          |      | x | x | x |
| Unidentified forms•                                                                                       |      | x | x | x |

---

### PHYLUM DINOFLAGELLATA

#### Class Dinophyceae

|                                                                                                                           |      |   |   |   |
|---------------------------------------------------------------------------------------------------------------------------|------|---|---|---|
| <i>Akashiwo</i> cf. <i>sanguinea</i> (K.Hirasaka) Gert Hansen & Moestrup 2000•                                            | b    | x | x | x |
| <i>Alexandrium</i> cf. <i>minutum</i> Halim, 1960                                                                         | b, c |   |   | x |
| <i>Alexandrium</i> spp. Halim, 1960                                                                                       |      |   | x | x |
| <i>Amphidinium crassum</i> Lohmann, 1908                                                                                  |      |   |   | x |
| <i>Amphidinium</i> sp. Claperède & Lachmann, 1859                                                                         |      |   |   | x |
| <i>Ceratium hirundinella</i> (O.F.Müller) Dujardin, 1841                                                                  |      |   |   | x |
| <i>Cochlodinium</i> spp. F.Schütt, 1896                                                                                   |      | x |   |   |
| <i>Dinophysis acuminata</i> complex Claparède & Lachmann, 1859•                                                           | b, c |   |   | x |
| <i>Dinophysis caudata</i> Kent, 1881                                                                                      |      |   |   | x |
| <i>Dinophysis odiosa</i> (Pavillard) Tai & Skogsberg, 1934                                                                |      |   |   | x |
| <i>Dinophysis ovum</i> F.Schütt, 1895                                                                                     |      | x |   |   |
| <i>Dinophysis</i> sp. Ehrenberg, 1839•                                                                                    |      | x | x | x |
| <i>Gonyaulax digitalis</i> (Pouchet) Kofoid, 1911•                                                                        |      | x | x | x |
| <i>Gonyaulax</i> spp. Diesing, 1866•                                                                                      |      | x |   | x |
| <i>Gonyaulax verior</i> Sournia, 1973                                                                                     |      |   |   | x |
| <i>Gymnodinium</i> cf. <i>catenatum</i> H.W.Graham 1943                                                                   | b, c |   |   | x |
| <i>Gymnodinium</i> sp. F.Stein, 1878                                                                                      |      | x | x | x |
| <i>Heterocapsa</i> cf. <i>minima</i> A.J.Pomroy 1989                                                                      |      |   |   | x |
| <i>Heterocapsa pygmaea</i> Lobelich III, R.J.Schmidt & Sherley, 1981                                                      |      | x |   | x |
| <i>Heterocapsa</i> spp. F.Stein, 1883, nom. et typ. cons.•                                                                |      | x | x | x |
| <i>Heterocapsa rotundata</i> (Lohmann) Gert Hansen, 1995•                                                                 |      | x | x | x |
| <i>Karenia</i> spp. Hansen & Moestrup, 2000                                                                               |      | x | x |   |
| <i>Karlodinium</i> spp. J.Larsen, 2000•                                                                                   |      | x | x | x |
| <i>Katodinium</i> sp. Fott, 1957                                                                                          |      |   |   | x |
| <i>Kryptoperidinium foliaceum</i> (F.Stein) Lindemann, 1924•                                                              | a    | x | x | x |
| <i>Lingulodinium polyedra</i> (F.Stein) J.D.Dodge, 1989•                                                                  | b, c |   | x | x |
| cf. <i>Margalefidinium polykrikoides</i> (Margalef) F.Gómez, Richlen & D.M.Anderson, 2017•                                |      | x | x | x |
| cf. <i>Ostreopsis</i> sp. Johs.Schmidt, 1901                                                                              |      |   | x |   |
| <i>Oxytoxum</i> sp. Stein, 1883                                                                                           |      |   | x |   |
| <i>Polykrikos</i> sp. Bütschli, 1873                                                                                      |      |   |   | x |
| <i>Prorocentrum cordatum</i> (Ostenfeld) J.D.Dodge, 1976•                                                                 | b, c | x |   | x |
| <i>Prorocentrum dentatum</i> F. Stein, 1883 / <i>Prorocentrum shikokuense</i> Y. Hada, 1975                               |      |   |   | x |
| <i>Prorocentrum mexicanum</i> Osorio-Tafall, 1942 / <i>Prorocentrum rhathymum</i> Loeblich III, Sherley & Schmidt, 1979 B |      |   |   | x |

|                                                                           |   |   |   |   |
|---------------------------------------------------------------------------|---|---|---|---|
| <i>Prorocentrum micans</i> Ehrenberg, 1834•                               |   | X | X | X |
| <i>Prorocentrum</i> cf. <i>scutellum</i> B.Schröder, 1900•                |   | X |   | X |
| <i>Prorocentrum</i> spp. Ehrenberg, 1834•                                 |   | X |   | X |
| <i>Prorocentrum triestinum</i> J.Schiller, 1918•                          |   |   | X | X |
| <i>Scrippsiella trochoidea</i> (F.Stein) A.R.Loeblich III, 1976           |   |   |   | X |
| <i>Scrippsiella</i> spp. Balech, 1965•                                    |   | X | X | X |
| <i>Torodinium robustum</i> Kofoid & Swezy, 1921                           |   |   |   | X |
| <i>Torodinium</i> sp. Kofoid & Swezy, 1921                                |   |   |   | X |
| <i>Tripos furca</i> (Ehrenberg) F.Gómez, 2013•                            | a |   | X | X |
| <i>Tripos fusus</i> (Ehrenberg) F.Gómez, 2013•                            | a | X |   | X |
| <i>Tripos lineatus</i> (Ehrenberg) F.Gómez, 2021                          |   |   |   | X |
| <i>Tripos</i> spp. Bory, 1823                                             |   |   |   | X |
| Unidentified forms of the order Amphidomataceae/ <i>Heterocapsa</i> sp. • |   | X | X | X |
| Unidentified forms of the order Gymnodiniales < 20 µm•                    |   | X | X | X |
| Unidentified forms of the order Gymnodiniales > 20 µm•                    |   | X | X | X |
| Other unidentified thecate dinoflagellates < 20 µm•                       |   | X | X | X |
| Other unidentified thecate dinoflagellates > 20 µm•                       |   | X | X | X |
| Unidentified dinoflagellates < 20 µm•                                     |   | X | X | X |
| Unidentified dinoflagellates > 20 µm•                                     |   | X |   | X |

---

## PHYLUM EUGLENOPHYTA

### Class Euglenophyceae

|                                                                   |  |   |   |   |
|-------------------------------------------------------------------|--|---|---|---|
| <i>Eutreptiella</i> spp. A.M.da Cunha, 1914•                      |  | X | X | X |
| <i>Lepocinclis acus</i> (O.F.Müller) B.Marin & Melkonian, 2003•FW |  | X | X | X |
| Unidentified forms•                                               |  | X | X | X |

---

## PHYLUM HAPTOPHYTA

### Class Coccolithophyceae

|                                |  |   |   |   |
|--------------------------------|--|---|---|---|
| Unidentified Coccolithophores• |  | X | X | X |
|--------------------------------|--|---|---|---|

---

## PHYLUM HETEROKONTOPHYTA

### Class Bacillariophyceae

|                                                                          |  |   |   |   |
|--------------------------------------------------------------------------|--|---|---|---|
| <i>Achnanthes</i> sp. Bory, 1822 B                                       |  |   | X |   |
| <i>Asterionellopsis glacialis</i> (Castracane) Round, 1990               |  |   |   | X |
| <i>Bacillaria</i> sp. Gmelin, 1791 B                                     |  | X |   |   |
| <i>Cocconeis</i> sp. Ehrenberg, 1836• B                                  |  | X | X | X |
| <i>Cylindrotheca closterium</i> (Ehrenberg) Reimann & J.C.Lewin, 1964• B |  | X | X | X |
| <i>Cymbella</i> sp./ <i>Amphora</i> sp. Ehrenberg ex Kützing, 1844 B     |  |   | X | X |
| <i>Diploneis</i> sp. Ehrenberg ex Cleve, 1894• B                         |  | X | X | X |
| <i>Entomoneis paludosa</i> (W.Smith) Reimer 1975 B                       |  | X | X |   |
| <i>Entomoneis</i> sp. Ehrenberg, 1845• B                                 |  | X | X |   |
| <i>Gomphonema</i> sp. Ehrenberg, 1832 B                                  |  | X |   |   |
| <i>Gyrosigma fasciola</i> (Ehrenberg) J.W.Griffith & Henfrey, 1856 B     |  | X |   |   |
| <i>Haslea wawriake</i> (Hustedt) Simonsen, 1974 B                        |  |   | X | X |
| <i>Licmophora</i> sp. C. Agardh, 1827, nom. et typ. cons. • B            |  | X |   | X |
| <i>Lioloma</i> sp. Hasle, 1996• B                                        |  | X | X | X |
| <i>Mastogloia</i> sp. Thwaites ex W.Smith, 1856 B                        |  | X |   | X |
| <i>Navicula</i> spp. Bory, 1822• B                                       |  | X | X | X |

|                                                                                |      |   |   |
|--------------------------------------------------------------------------------|------|---|---|
| <i>Nitzschia acicularis</i> (Kützing) W.Smith, 1853 B FW                       |      | X | X |
| <i>Nitzschia longissima</i> (Brébisson) Ralfs, 1861                            | X    | X |   |
| <i>Nitzschia reversa</i> W.Smith 1853• B                                       | X    | X | X |
| <i>Nitzschia sigma</i> (Kützing) W.Smith, 1853 B                               | X    |   | X |
| <i>Nitzschia</i> spp. Hassal, 1845•                                            | X    | X | X |
| <i>Pleurosigma</i> spp. W.Smith, 1852 / <i>Gyrosigma</i> spp. Hassall, 1845• B | X    | X | X |
| <i>Pseudo-nitzschia delicatissima</i> group (Cleve) Heiden 1928•               | b, c | X | X |
| <i>Pseudo-nitzschia seriata</i> group (Cleve) H. Peragallo 1899•               | b, c | X | X |
| <i>Surirella</i> sp. Turpin, 1828• B                                           | X    | X |   |
| <i>Thalassionema nitzschioides</i> (Grunow) Mereschkowsky, 1902• B             | X    |   | X |
| <i>Thalassionema</i> spp. Grunow ex Mereschkowsky, 1902• B                     | X    | X | X |
| Unidentified forms of the order Pennales < 10 µm• B                            | X    | X | X |
| Unidentified forms of the order Pennales > 10 µm• B                            | X    | X | X |

### **Class Coscinodiscophyceae**

|                                                                              |   |   |   |
|------------------------------------------------------------------------------|---|---|---|
| <i>Actinocyclus</i> sp. Ehrenberg, 1837•                                     |   | X |   |
| <i>Coscinodiscus</i> sp. Ehrenberg, 1839•                                    | X |   | X |
| <i>Dactyliosolen fragilissimus</i> (Bergon) Hasle, 1996                      | X | X | X |
| <i>Dactyliosolen phuketensis</i> (B.G.Sundström) G.R.Hasle, 1996             |   |   | X |
| <i>Guinardia delicatula</i> (Cleve) Hasle, 1997•                             | X | X | X |
| <i>Guinardia flaccida</i> (Castracane) H.Peragallo, 1892•                    |   | X | X |
| <i>Guinardia</i> spp. Peragallo, 1892•                                       | X |   | X |
| <i>Guinardia striata</i> (Stolterfoth) Hasle, 1996•                          | X | X | X |
| <i>Melosira</i> sp. C.Agardh, 1824•                                          | X | X |   |
| <i>Proboscia alata</i> (Brightwell) Sundström, 1986•                         |   | X | X |
| <i>Proboscia</i> cf. <i>indica</i> (H.Peragallo) Hernández-Becerril, 1995    |   |   | X |
| <i>Proboscia</i> sp. Sundström, 1986•                                        |   | X | X |
| <i>Rhizosolenia</i> sp. Brightwell, 1858                                     |   |   | X |
| <i>Sundstroemia setigera</i> Brightwell 1858 / <i>S. pungens</i> (Cl.-Euler) | X | X | X |
| Medlin, Lundholm, Boonprakob, Moestrup 2021•                                 |   |   |   |
| Unidentified centric forms•                                                  | X | X | X |

### **Class Dictyophyceae**

|                                       |  |   |   |
|---------------------------------------|--|---|---|
| <i>Dictyocha</i> sp. Ehrenberg, 1837• |  | X | X |
|---------------------------------------|--|---|---|

### **Class Mediophyceae**

|                                                          |   |   |   |
|----------------------------------------------------------|---|---|---|
| <i>Bacteriastrum hyalinum</i> Lauder, 1864               |   |   | X |
| <i>Bacteriastrum</i> sp. Shadbolt, 1854                  |   | X |   |
| <i>Cerataulina bergonii</i> (H.Peragallo) F.Schütt, 1896 |   |   | X |
| <i>Chaetoceros concavicornis</i> Mangin, 1917            |   |   | X |
| <i>Chaetoceros curvisetus</i> Cleve, 1889                |   | X |   |
| <i>Chaetoceros danicus</i> Cleve, 1889•                  |   | X | X |
| <i>Chaetoceros debilis</i> Cleve, 1894                   |   | X |   |
| <i>Chaetoceros peruvianus</i> Brightwell, 1856           |   |   | X |
| <i>Chaetoceros</i> spp. Ehrenberg, 1844•                 | X | X | X |
| <i>Chaetoceros tenuissimus</i> Meunier, 1913•            | X | X | X |
| <i>Cyclotella</i> sp. (Kützing) Brébisson, 1838•         | X | X | X |
| <i>Detonula pumila</i> (Castracane) Gran, 1900           |   |   | X |

|                                                     |   |   |   |
|-----------------------------------------------------|---|---|---|
| <i>Ditylum brightwellii</i> (T. West) Grunow, 1885  |   | x | x |
| <i>Eucampia cornuta</i> (Cleve) Grunow, 1883        |   |   | x |
| <i>Hemiaulus hauckii</i> Grunow ex Van Heurck, 1882 | x |   | x |
| <i>Hemiaulus sinensis</i> Greville, 1865            | x |   | x |
| <i>Hemiaulus</i> sp. Heiberg, 1863•                 |   | x | x |
| <i>Leptocylindrus danicus</i> Cleve, 1889•          | x | x | x |
| <i>Leptocylindrus minimus</i> Gran, 1915•           | x | x | x |
| <i>Leptocylindrus</i> sp. Cleve, 1889•              |   | x | x |
| <i>Skeletonema costatum</i> (Greville) Cleve, 1873• | x | x | x |
| <i>Skeletonema</i> sp. Greville, 1865•              | x | x | x |
| <i>Thalassiosira</i> sp. Cleve, 1873•               | x | x | x |

---

## PHYLUM OCHROPHYTA

### Class Raphidophyceae

|                                                                                 |   |   |   |   |
|---------------------------------------------------------------------------------|---|---|---|---|
| cf. <i>Heterosigma akashiwo</i> (Y. Hada) Y. Hada ex Y. Hara & M. Chihara 1987• | b | x | x | x |
| <i>Heterosigma</i> sp. Y. Hada ex Y. Hara & M. Chihara, 1987                    |   |   |   | x |
| Unidentified forms•                                                             |   | x | x | x |

---

|                             |  |           |           |            |
|-----------------------------|--|-----------|-----------|------------|
| <b>TOTAL NUMBER OF OTUs</b> |  | <b>93</b> | <b>90</b> | <b>120</b> |
|-----------------------------|--|-----------|-----------|------------|

---

**Supplementary Table S4** – General statistical information, including mean, standard deviation (SD), minimum (Min), maximum (Max) values, and number of observations (N), for different phytoplankton alpha diversity metrics, in the Ria Formosa lagoon, during the period September 2018 - September 2020. Significant differences between year seasons ( $p < 0.05$ ), tested by Kruskal-Wallis rank test, followed by post-hoc pairwise comparisons, are also included. Asterisk symbols \*, \*\* indicate  $p$ -value  $< 0.05$ , and  $< 0.01$ , respectively. ns: not significant.

| Diversity metric  | Season | Mean $\pm$ SD   | Min - Max   | N  | Differences between seasons           |
|-------------------|--------|-----------------|-------------|----|---------------------------------------|
| Species diversity | Autumn | 1.7 $\pm$ 0.3   | 1.2 - 2.5   | 14 | ns                                    |
|                   | Winter | 1.8 $\pm$ 0.3   | 1.1 - 2.3   | 12 |                                       |
|                   | Spring | 1.8 $\pm$ 0.4   | 0.8 - 2.5   | 15 |                                       |
|                   | Summer | 1.4 $\pm$ 0.5   | 0.6 - 2.2   | 21 |                                       |
| Species evenness  | Autumn | 0.6 $\pm$ 0.1   | 0.4 - 0.7   | 14 | Autumn*, Winter* and Spring* > Summer |
|                   | Winter | 0.6 $\pm$ 0.1   | 0.5 - 0.8   | 12 |                                       |
|                   | Spring | 0.6 $\pm$ 0.1   | 0.2 - 0.8   | 15 |                                       |
|                   | Summer | 0.5 $\pm$ 0.1   | 0.2 - 0.6   | 21 |                                       |
| Species richness  | Autumn | 19.4 $\pm$ 7.9  | 8.0 - 34.0  | 14 | ns                                    |
|                   | Winter | 20.0 $\pm$ 8.2  | 10.0 - 32.0 | 12 |                                       |
|                   | Spring | 25.0 $\pm$ 7.2  | 15.0 - 41.0 | 15 |                                       |
|                   | Summer | 24.5 $\pm$ 7.5  | 11.0 - 41.0 | 21 |                                       |
| Species dominance | Autumn | 63.3 $\pm$ 11.1 | 39.4 - 81.5 | 14 | ns                                    |
|                   | Winter | 63.9 $\pm$ 13.2 | 41.2 - 88.3 | 12 |                                       |
|                   | Spring | 62.6 $\pm$ 14.7 | 37.3 - 90.3 | 15 |                                       |
|                   | Summer | 72.5 $\pm$ 14.8 | 47.9 - 95.5 | 21 |                                       |

**Supplementary Table S5** – Summary of PERMANOVA (permutational multivariate analysis of variance) tests evaluating differences in the structure of phytoplankton assemblages in the Ria Formosa lagoon (period: September 2018 - September 2020), considering station and season as factors, and results of pairwise comparisons for each factor. Sampling stations are located at 250 m (ALM 250), 750 m (ALM 750) and 1750 m (ALM 1750) from the discharge point of the Almargem wastewater treatment plant. df: degrees of freedom; SS: sum of squares; partial  $R^2$ : partial coefficient of determination; Pseudo-F: pseudo-F ratio; P-val (perm): permutation P-value. Asterisk symbols \*, \*\*, \*\*\* indicate p-value <0.05, <0.01, and <0.001, respectively. ns: not significant.

| <b>Factor</b>    | <b>df</b> | <b>SS</b> | <b>Partial <math>R^2</math></b> | <b>Pseudo-F</b> | <b>P-val (perm)</b> | <b>Differences between ALM stations and seasons</b> |
|------------------|-----------|-----------|---------------------------------|-----------------|---------------------|-----------------------------------------------------|
| Station          | 2         | 0.8       | 0.1                             | 3.0             | 0.001               | 250 $\neq$ 1750*** and 750 $\neq$ 1750**            |
| Season           | 3         | 2.4       | 0.2                             | 6.3             | 0.001               | Autumn $\neq$ Winter** and all other comparisons*** |
| Station x Season | 6         | 0.6       | 0.1                             | 0.8             | 0.933               | ns                                                  |

**Supplementary Table S6** – Summary of the results of the similarity percentage (SIMPER) analysis, applied to the dissimilarity in the structure of phytoplankton assemblages for two sampling stations in the Ria Formosa lagoon (ALM 250 and ALM 1750), during the period September 2018 - September 2020. Phytoplankton taxa are listed in descending order of importance and, for each taxa, the mean abundance for the two stations ( $\log(\text{cells L}^{-1} + 1)$ ), and the percentage contribution to the overall dissimilarity between stations (Contrib.) are provided. The cumulative percentage contribution (Cumulative contrib.), representing the sum of the individual contributions, shows how total dissimilarity is built up by the contributing species. Only the taxonomic entities that explained up to 70% of the cumulative dissimilarity are shown. Symbols next to each taxa represent different phytoplankton groups, including diatoms or specific phyla: <sup>Δ</sup> – Diatoms; <sup>◊</sup> – Dinoflagellata; <sup>□</sup> – Cyanobacteriota; <sup>\*</sup> – Chlorophyta; <sup>+</sup> - Cryptista; <sup>^</sup> - Euglenophyta; <sup>•</sup> - Haptophyta.

**SIMPER overall average dissimilarity = 59.1 %**

| Phytoplankton taxa                                            | Abundance<br>ALM 250 | Abundance<br>ALM 1750 | Contrib.<br>(%) | Cumulative<br>contrib. (%) |
|---------------------------------------------------------------|----------------------|-----------------------|-----------------|----------------------------|
| <i>Chaetoceros</i> spp. <sup>Δ</sup>                          | 2.4                  | 4.1                   | 5.0             | 5.0                        |
| <i>Kryptoperidinium foliaceum</i> <sup>◊</sup>                | 2.5                  | 0.1                   | 3.9             | 8.9                        |
| Unidentified Oscillatoriales <sup>□</sup>                     | 2.4                  | 0.6                   | 3.7             | 12.7                       |
| <i>Pseudo-nitzschia delicatissima</i> group <sup>Δ</sup>      | 1.0                  | 2.6                   | 3.7             | 16.3                       |
| Unidentified Chlorophyte 1 <sup>*</sup>                       | 3.7                  | 4.0                   | 3.7             | 20.0                       |
| Unidentified Pennales < 10 μm <sup>Δ</sup>                    | 2.5                  | 1.5                   | 3.5             | 23.5                       |
| Unidentified Cryptophyceae < 10 μm <sup>+</sup>               | 5.9                  | 5.3                   | 3.4             | 26.9                       |
| <i>Eutreptiella</i> spp. <sup>^</sup>                         | 2.3                  | 1.5                   | 3.2             | 30.1                       |
| Unidentified Pennales > 10 μm <sup>Δ</sup>                    | 3.3                  | 2.4                   | 3.0             | 33.2                       |
| <i>Thalassiosira</i> sp. <sup>Δ</sup>                         | 1.6                  | 0.9                   | 2.9             | 36.1                       |
| Unidentified Gymnodiniales < 20 μm <sup>◊</sup>               | 2.7                  | 1.7                   | 2.9             | 39.0                       |
| Unidentified Coccolithophores <sup>•</sup>                    | 2.4                  | 1.8                   | 2.9             | 41.9                       |
| <i>Cylindrotheca closterium</i> <sup>Δ</sup>                  | 2.0                  | 2.2                   | 2.7             | 44.5                       |
| Unidentified phytoplankton > 10 μm                            | 1.6                  | 0.9                   | 2.6             | 47.2                       |
| Unidentified Cryptophyceae > 10 μm <sup>+</sup>               | 4.3                  | 4.1                   | 2.6             | 49.8                       |
| <i>Pseudo-nitzschia seriata</i> group <sup>Δ</sup>            | 0.1                  | 1.9                   | 2.5             | 52.3                       |
| <i>Skeletonema</i> sp. <sup>Δ</sup>                           | 0.4                  | 1.4                   | 2.3             | 54.6                       |
| <i>Heterocapsa</i> spp. <sup>◊</sup>                          | 0.5                  | 1.5                   | 2.3             | 56.9                       |
| Unidentified centric forms <sup>Δ</sup>                       | 0.6                  | 1.4                   | 2.2             | 59.0                       |
| Unidentified Gymnodiniales > 20 μm <sup>◊</sup>               | 1.2                  | 0.4                   | 2.0             | 61.1                       |
| <i>Navicula</i> spp. <sup>Δ</sup>                             | 1.1                  | 0.6                   | 2.0             | 63.1                       |
| <i>Sundstroemia setigera</i> / <i>S. pungens</i> <sup>Δ</sup> | 0.5                  | 1.3                   | 2.0             | 65.1                       |
| <i>Leptocylindrus danicus</i> <sup>Δ</sup>                    | 0.5                  | 1.2                   | 1.9             | 66.9                       |
| <i>Cyclotella</i> sp. <sup>Δ</sup>                            | 1.0                  | 0.5                   | 1.8             | 68.7                       |
| <i>Skeletonema costatum</i> <sup>Δ</sup>                      | 0.4                  | 0.7                   | 1.7             | 70.5                       |

**Supplementary Table S7** – Summary of the results of the similarity percentage (SIMPER) analysis, applied to the dissimilarity in the structure of phytoplankton assemblages for two sampling stations in the Ria Formosa lagoon (ALM 750 and ALM 1750), during the period September 2018 - September 2020. For each phytoplankton taxa, the mean abundance for the two stations ( $\log(\text{cells L}^{-1} + 1)$ ), and the percentage contribution to the overall dissimilarity between stations (Contrib.) are provided. The cumulative percentage contribution (Cumulative contrib.), representing the sum of the individual contributions, shows how total dissimilarity is built up by the contributing species. Only the taxonomic entities that explained up to 70% of the cumulative dissimilarity are shown. Symbols next to each taxa represent different phytoplankton groups, including diatoms or specific phyla:  $\Delta$  – Diatoms; \* – Chlorophyta; + – Cryptista;  $^{\circ}$  – Dinoflagellata;  $\wedge$  – Euglenophyta;  $\bullet$  – Haptophyta;  $\square$  – Cyanobacteriota.

| <b>SIMPER overall average dissimilarity = 58.0 %</b>      |                              |                               |                         |                                    |
|-----------------------------------------------------------|------------------------------|-------------------------------|-------------------------|------------------------------------|
| <b>Phytoplankton taxa</b>                                 | <b>Abundance<br/>ALM 750</b> | <b>Abundance<br/>ALM 1750</b> | <b>Contrib.<br/>(%)</b> | <b>Cumulative<br/>contrib. (%)</b> |
| <i>Chaetoceros</i> spp. $\Delta$                          | 3.1                          | 4.1                           | 4.7                     | 4.7                                |
| Unidentified Chlorophyte 1 *                              | 3.7                          | 4.0                           | 3.8                     | 8.5                                |
| <i>Pseudo-nitzschia delicatissima</i> group $\Delta$      | 1.7                          | 2.6                           | 3.8                     | 12.3                               |
| Unidentified Cryptophyceae < 10 $\mu\text{m}^+$           | 5.5                          | 5.3                           | 3.7                     | 16.0                               |
| <i>Kryptoperidinium foliaceum</i> $^{\circ}$              | 2.4                          | 0.1                           | 3.6                     | 19.6                               |
| <i>Thalassiosira</i> sp. $\Delta$                         | 2.1                          | 0.9                           | 3.6                     | 23.2                               |
| <i>Eutreptiella</i> spp. $\wedge$                         | 2.6                          | 1.5                           | 3.2                     | 26.4                               |
| Unidentified Coccolithophores $\bullet$                   | 2.4                          | 1.8                           | 3.0                     | 29.4                               |
| Unidentified Pennales < 10 $\mu\text{m}^{\Delta}$         | 1.9                          | 1.5                           | 2.9                     | 32.4                               |
| Unidentified Pennales > 10 $\mu\text{m}^{\Delta}$         | 2.9                          | 2.4                           | 2.9                     | 35.2                               |
| Unidentified Oscillatoriales $\square$                    | 1.8                          | 0.6                           | 2.8                     | 38.1                               |
| Unidentified Gymnodiniales < 20 $\mu\text{m}^{\circ}$     | 2.3                          | 1.7                           | 2.8                     | 40.9                               |
| Unidentified phytoplankton > 10 $\mu\text{m}$             | 1.8                          | 0.9                           | 2.8                     | 43.7                               |
| <i>Pseudo-nitzschia seriata</i> group $\Delta$            | 0.6                          | 1.9                           | 2.7                     | 46.3                               |
| <i>Skeletonema</i> sp. $\Delta$                           | 0.6                          | 1.4                           | 2.6                     | 48.9                               |
| <i>Cylindrotheca closterium</i> $\Delta$                  | 2.1                          | 2.2                           | 2.5                     | 51.4                               |
| Unidentified Cryptophyceae > 10 $\mu\text{m}^+$           | 4.5                          | 4.1                           | 2.5                     | 53.9                               |
| <i>Sundstroemia setigera</i> / <i>S. pungens</i> $\Delta$ | 0.9                          | 1.3                           | 2.3                     | 56.2                               |
| <i>Heterocapsa</i> spp. $^{\circ}$                        | 0.3                          | 1.5                           | 2.2                     | 58.5                               |
| Unidentified centric forms $\Delta$                       | 0.4                          | 1.4                           | 2.2                     | 60.6                               |
| <i>Leptocylindrus danicus</i> $\Delta$                    | 0.8                          | 1.2                           | 2.1                     | 62.8                               |
| Amphidomataceae/ <i>Heterocapsa</i> sp. $^{\circ}$        | 0.8                          | 1.0                           | 2.0                     | 64.7                               |
| Unidentified Gymnodiniales > 20 $\mu\text{m}^{\circ}$     | 1.1                          | 0.4                           | 1.9                     | 66.6                               |
| <i>Cyclotella</i> sp. $\Delta$                            | 0.9                          | 0.5                           | 1.8                     | 68.4                               |
| <i>Guinardia delicatula</i> $\Delta$                      | 0.4                          | 0.9                           | 1.8                     | 70.2                               |



**Supplementary Table S8** – Summary of the results of the similarity percentage (SIMPER) analysis, applied to the dissimilarity in the structure of phytoplankton assemblages during two seasons in the Ria Formosa lagoon (Summer and Autumn), during the period September 2018 - September 2020. For each phytoplankton taxa, the mean abundance for the two seasons (log (cells L<sup>-1</sup> + 1)), and the percentage contribution to the overall dissimilarity between stations (Contrib.) are provided. The cumulative percentage contribution (Cumulative contrib.), representing the sum of the individual contributions, shows how total dissimilarity is built up by the contributing species. Only the taxonomic entities that explained up to 70% of the cumulative dissimilarity are shown. Symbols next to each taxa represent different phytoplankton groups, including diatoms or specific phyla: <sup>Δ</sup> – Diatoms; \* – Chlorophyta; <sup>+</sup> - Cryptista; <sup>□</sup> – Cyanobacteriota; <sup>^</sup> - Euglenophyta; <sup>°</sup> – Dinoflagellata; • - Haptophyta.

---

**SIMPER overall average dissimilarity = 57.8 %**

---

| Phytoplankton taxa                                            | Abundance<br>Summer | Abundance<br>Autumn | Contrib.<br>(%) | Cumulative<br>contrib. (%) |
|---------------------------------------------------------------|---------------------|---------------------|-----------------|----------------------------|
| <i>Thalassiosira</i> sp. <sup>Δ</sup>                         | 3.9                 | 0.1                 | 6.1             | 6.1                        |
| <i>Chaetoceros</i> spp. <sup>Δ</sup>                          | 4.9                 | 1.5                 | 6.1             | 12.1                       |
| Unidentified Pennales < 10 μm <sup>Δ</sup>                    | 3.4                 | 0.7                 | 4.3             | 16.5                       |
| <i>Pseudo-nitzschia delicatissima</i> group <sup>Δ</sup>      | 3.3                 | 1.5                 | 4.3             | 20.7                       |
| Unidentified Chlorophyte 1 <sup>*</sup>                       | 5.8                 | 3.3                 | 4.2             | 25.0                       |
| <i>Cylindrotheca closterium</i> <sup>Δ</sup>                  | 3.1                 | 1.1                 | 3.6             | 28.6                       |
| <i>Sundstroemia setigera</i> / <i>S. pungens</i> <sup>Δ</sup> | 2.5                 | 0.2                 | 3.6             | 32.2                       |
| <i>Cyclotella</i> sp. <sup>Δ</sup>                            | 2.4                 | 0.0                 | 3.5             | 35.7                       |
| Unidentified Cryptophyceae < 10 μm <sup>+</sup>               | 6.7                 | 4.9                 | 3.5             | 39.2                       |
| Unidentified Oscillatoriales <sup>□</sup>                     | 1.8                 | 1.3                 | 3.2             | 42.4                       |
| Unidentified Pennales > 10 μm <sup>Δ</sup>                    | 3.4                 | 1.6                 | 3.2             | 45.6                       |
| <i>Skeletonema</i> sp. <sup>Δ</sup>                           | 1.2                 | 1.7                 | 3.1             | 48.7                       |
| Unidentified Cryptophyceae > 10 μm <sup>+</sup>               | 3.9                 | 4.9                 | 3.0             | 51.7                       |
| Unidentified phytoplankton > 10 μm                            | 2.1                 | 0.2                 | 2.7             | 54.4                       |
| <i>Eutreptiella</i> spp. <sup>^</sup>                         | 2.8                 | 3.0                 | 2.7             | 57.1                       |
| Unidentified Gymnodiniales < 20 μm <sup>°</sup>               | 2.6                 | 1.7                 | 2.7             | 59.8                       |
| Unidentified Coccolithophores <sup>•</sup>                    | 2.2                 | 2.1                 | 2.4             | 62.2                       |
| Unidentified Gymnodiniales > 20 μm <sup>°</sup>               | 0.8                 | 1.3                 | 2.1             | 64.4                       |
| <i>Pseudo-nitzschia seriata</i> group <sup>Δ</sup>            | 1.1                 | 0.7                 | 1.9             | 66.3                       |
| <i>Kryptoperidinium foliaceum</i> <sup>°</sup>                | 1.0                 | 0.8                 | 1.8             | 68.1                       |
| <i>Guinardia delicatula</i> <sup>Δ</sup>                      | 0.1                 | 1.1                 | 1.7             | 69.8                       |

---

**Supplementary Table S9** – Summary of the results of the similarity percentage (SIMPER) analysis, applied to the dissimilarity in the structure of phytoplankton assemblages during two seasons in the Ria Formosa lagoon (Summer and Winter), during the period September 2018 - September 2020. For each phytoplankton taxa, the mean abundance for the two seasons (log (cells L<sup>-1</sup> + 1)), and the percentage contribution to the overall dissimilarity between stations (Contrib.) are provided. The cumulative percentage contribution (Cumulative contrib.), representing the sum of the individual contributions, shows how total dissimilarity is built up by the contributing species. Only the taxonomic entities that explained up to 70% of the cumulative dissimilarity are shown. Symbols next to each taxa represent different phytoplankton groups, including diatoms or specific phyla: \* – Chlorophyta; <sup>Δ</sup> – Diatoms; <sup>+</sup> – Cryptista; <sup>^</sup> - Euglenophyta; <sup>□</sup> – Cyanobacteriota; <sup>°</sup> – Dinoflagellata; <sup>•</sup> - Haptophyta.

---

**SIMPER overall average dissimilarity = 65.8 %**

---

| Phytoplankton taxa                                            | Abundance<br>Summer | Abundance<br>Winter | Contrib.<br>(%) | Cumulative<br>contrib. (%) |
|---------------------------------------------------------------|---------------------|---------------------|-----------------|----------------------------|
| Unidentified Chlorophyte 1 *                                  | 5.8                 | 1.5                 | 6.2             | 6.2                        |
| <i>Chaetoceros</i> spp. <sup>Δ</sup>                          | 4.9                 | 1.0                 | 5.8             | 12.1                       |
| <i>Thalassiosira</i> sp. <sup>Δ</sup>                         | 3.9                 | 0.5                 | 5.5             | 17.6                       |
| Unidentified Cryptophyceae < 10 μm <sup>+</sup>               | 6.7                 | 3.5                 | 5.2             | 22.8                       |
| <i>Pseudo-nitzschia delicatissima</i> group <sup>Δ</sup>      | 3.3                 | 0.3                 | 4.5             | 27.3                       |
| Unidentified Pennales < 10 μm <sup>Δ</sup>                    | 3.4                 | 1.1                 | 3.6             | 30.9                       |
| <i>Eutreptiella</i> spp. <sup>^</sup>                         | 2.8                 | 0.6                 | 3.4             | 34.3                       |
| <i>Sundstroemia setigera</i> / <i>S. pungens</i> <sup>Δ</sup> | 2.5                 | 0.0                 | 3.3             | 37.6                       |
| <i>Cyclotella</i> sp. <sup>Δ</sup>                            | 2.4                 | 0.0                 | 3.3             | 40.9                       |
| Unidentified phytoplankton > 10 μm                            | 2.1                 | 0.9                 | 2.9             | 43.8                       |
| Unidentified Oscillatoriales <sup>□</sup>                     | 1.8                 | 1.1                 | 2.9             | 46.7                       |
| Unidentified Gymnodiniales < 20 μm <sup>°</sup>               | 2.6                 | 1.0                 | 2.8             | 49.5                       |
| Unidentified Cryptophyceae > 10 μm <sup>+</sup>               | 3.9                 | 4.3                 | 2.8             | 52.3                       |
| <i>Cylindrotheca closterium</i> <sup>Δ</sup>                  | 3.1                 | 1.8                 | 2.7             | 55.0                       |
| Unidentified Pennales > 10 μm <sup>Δ</sup>                    | 3.4                 | 2.2                 | 2.6             | 57.6                       |
| Unidentified Coccolithophores <sup>•</sup>                    | 2.2                 | 1.7                 | 2.6             | 60.2                       |
| <i>Kryptoperidinium foliaceum</i> <sup>°</sup>                | 1.0                 | 1.4                 | 2.3             | 62.5                       |
| <i>Skeletonema costatum</i> <sup>Δ</sup>                      | 0.2                 | 1.3                 | 2.0             | 64.5                       |
| <i>Skeletonema</i> sp. <sup>Δ</sup>                           | 1.2                 | 0.0                 | 1.8             | 66.3                       |
| Unidentified Chlorophyceae <sup>*</sup>                       | 1.0                 | 0.5                 | 1.6             | 67.9                       |
| <i>Navicula</i> spp. <sup>Δ</sup>                             | 0.7                 | 0.8                 | 1.6             | 69.5                       |

---

**Supplementary Table S10** – Summary of the results of the similarity percentage (SIMPER) analysis, applied to the dissimilarity in the structure of phytoplankton assemblages during two seasons in the Ria Formosa lagoon (Summer and Spring), during the period September 2018 - September 2020. For each phytoplankton taxa, the mean abundance for the two seasons (log (cells L<sup>-1</sup> + 1)), and the percentage contribution to the overall dissimilarity between stations (Contrib.) are provided. The cumulative percentage contribution (Cumulative contrib.), representing the sum of the individual contributions, shows how total dissimilarity is built up by the contributing species. Only the taxonomic entities that explained up to 70% of the cumulative dissimilarity are shown. Symbols next to each taxa represent different phytoplankton groups, including diatoms or specific phyla: <sup>Δ</sup> – Diatoms; <sup>°</sup> – Dinoflagellata; \* – Chlorophyta; <sup>□</sup> – Cyanobacteriota; <sup>^</sup> - Euglenophyta; <sup>+</sup> - Cryptista; <sup>•</sup> - Haptophyta.

---

**SIMPER overall average dissimilarity = 53.8 %**

---

| Phytoplankton taxa                                            | Abundance<br>Summer | Abundance<br>Spring | Contrib.<br>(%) | Cumulative<br>contrib. (%) |
|---------------------------------------------------------------|---------------------|---------------------|-----------------|----------------------------|
| <i>Thalassiosira</i> sp. <sup>Δ</sup>                         | 3.9                 | 0.3                 | 5.2             | 5.2                        |
| <i>Kryptoperidinium foliaceum</i> <sup>°</sup>                | 1.0                 | 3.6                 | 4.4             | 9.6                        |
| <i>Pseudo-nitzschia delicatissima</i> group <sup>Δ</sup>      | 3.3                 | 1.1                 | 3.7             | 13.3                       |
| Unidentified phytoplankton > 10 μm                            | 2.1                 | 1.8                 | 3.6             | 16.9                       |
| Unidentified Chlorophyte 1 <sup>*</sup>                       | 5.8                 | 3.4                 | 3.5             | 20.4                       |
| <i>Chaetoceros</i> spp. <sup>Δ</sup>                          | 4.9                 | 4.0                 | 3.3             | 23.7                       |
| Unidentified Oscillatoriales <sup>□</sup>                     | 1.8                 | 1.8                 | 3.2             | 26.9                       |
| <i>Sundstroemia setigera</i> / <i>S. pungens</i> <sup>Δ</sup> | 2.5                 | 0.0                 | 3.2             | 30.1                       |
| <i>Eutreptiella</i> spp. <sup>^</sup>                         | 2.8                 | 1.8                 | 3.2             | 33.3                       |
| Unidentified Pennales < 10 μm <sup>Δ</sup>                    | 3.4                 | 1.8                 | 3.2             | 36.5                       |
| <i>Cyclotella</i> sp. <sup>Δ</sup>                            | 2.4                 | 0.0                 | 3.1             | 39.6                       |
| Unidentified Cryptophyceae > 10 μm <sup>+</sup>               | 3.9                 | 4.2                 | 2.9             | 42.5                       |
| <i>Cylindrotheca closterium</i> <sup>Δ</sup>                  | 3.1                 | 1.8                 | 2.6             | 45.1                       |
| <i>Leptocylindrus danicus</i> <sup>Δ</sup>                    | 1.3                 | 1.2                 | 2.5             | 47.6                       |
| <i>Navicula</i> spp. <sup>Δ</sup>                             | 0.7                 | 1.8                 | 2.4             | 50.0                       |
| Unidentified Pennales > 10 μm <sup>Δ</sup>                    | 3.4                 | 3.9                 | 2.3             | 52.3                       |
| Unidentified Coccolithophores <sup>•</sup>                    | 2.2                 | 2.7                 | 2.3             | 54.6                       |
| Unidentified Cyanophyceae <sup>□</sup>                        | 0.8                 | 1.4                 | 2.2             | 56.8                       |
| Unidentified Gymnodiniales < 20 μm <sup>°</sup>               | 2.6                 | 3.3                 | 2.2             | 59.0                       |
| <i>Pseudo-nitzschia seriata</i> group <sup>Δ</sup>            | 1.1                 | 1.2                 | 2.2             | 61.2                       |
| <i>Heterocapsa</i> spp. <sup>°</sup>                          | 0.5                 | 1.6                 | 2.2             | 63.3                       |
| Unidentified Gymnodiniales > 20 μm <sup>°</sup>               | 0.8                 | 1.3                 | 2.0             | 65.4                       |
| Unidentified Chlorophyceae <sup>*</sup>                       | 1.0                 | 1.0                 | 1.9             | 67.2                       |
| Unidentified centric forms <sup>Δ</sup>                       | 0.7                 | 1.3                 | 1.9             | 69.1                       |

---

**Supplementary Table S11** – Summary of the results of the similarity percentage (SIMPER) analysis, applied to the dissimilarity in the structure of phytoplankton assemblages during two seasons in the Ria Formosa lagoon (Autumn and Winter), during the period September 2018 - September 2020. For each phytoplankton taxa, the mean abundance for the two seasons (log (cells L<sup>-1</sup> + 1)), and the percentage contribution to the overall dissimilarity between stations (Contrib.) are provided. The cumulative percentage contribution (Cumulative contrib.), representing the sum of the individual contributions, shows how total dissimilarity is built up by the contributing species. Only the taxonomic entities that explained up to 70% of the cumulative dissimilarity are shown. Symbols next to each taxa represent different phytoplankton groups, including diatoms or specific phyla: <sup>+</sup> – Cryptista; <sup>^</sup> – Euglenophyta; <sup>\*</sup> – Chlorophyta; <sup>•</sup> – Haptophyta; <sup>□</sup> – Cyanobacteriota; <sup>Δ</sup> – Diatoms; <sup>°</sup> – Dinoflagellata.

---

**SIMPER overall average dissimilarity = 58.9 %**

---

| Phytoplankton taxa                                              | Abundance<br>Autumn | Abundance<br>Winter | Contrib.<br>(%) | Cumulative<br>contrib. (%) |
|-----------------------------------------------------------------|---------------------|---------------------|-----------------|----------------------------|
| Unidentified Cryptophyceae < 10 μm <sup>+</sup>                 | 4.9                 | 3.5                 | 5.8             | 5.8                        |
| <i>Eutreptiella</i> spp. <sup>^</sup>                           | 3.0                 | 0.6                 | 5.8             | 11.7                       |
| Unidentified Chlorophyte 1 <sup>*</sup>                         | 3.3                 | 1.5                 | 5.1             | 16.8                       |
| Unidentified Coccolithophores <sup>•</sup>                      | 2.1                 | 1.7                 | 4.0             | 20.8                       |
| Unidentified Oscillatoriales <sup>□</sup>                       | 1.3                 | 1.1                 | 3.8             | 24.6                       |
| <i>Chaetoceros</i> spp. <sup>Δ</sup>                            | 1.5                 | 1.0                 | 3.7             | 28.3                       |
| <i>Kryptoperidinium foliaceum</i> <sup>°</sup>                  | 0.8                 | 1.4                 | 3.6             | 31.9                       |
| <i>Skeletonema costatum</i> <sup>Δ</sup>                        | 0.6                 | 1.3                 | 3.5             | 35.4                       |
| Unidentified Pennales > 10 μm <sup>Δ</sup>                      | 1.6                 | 2.2                 | 3.4             | 38.8                       |
| <i>Skeletonema</i> sp. <sup>Δ</sup>                             | 1.7                 | 0.0                 | 3.3             | 42.2                       |
| Unidentified Gymnodiniales < 20 μm <sup>°</sup>                 | 1.7                 | 1.0                 | 3.3             | 45.5                       |
| <i>Pseudo-nitzschia delicatissima</i> group <sup>Δ</sup>        | 1.5                 | 0.3                 | 3.2             | 48.6                       |
| <i>Cylindrotheca closterium</i> <sup>Δ</sup>                    | 1.1                 | 1.8                 | 2.9             | 51.6                       |
| Unidentified Gymnodiniales > 20 μm <sup>°</sup>                 | 1.3                 | 0.2                 | 2.9             | 54.5                       |
| Unidentified Pennales < 10 μm <sup>Δ</sup>                      | 0.7                 | 1.1                 | 2.9             | 57.4                       |
| <i>Guinardia delicatula</i> <sup>Δ</sup>                        | 1.1                 | 0.3                 | 2.7             | 60.1                       |
| <i>Oscillatoria</i> spp./ <i>Planktothrix</i> spp. <sup>□</sup> | 0.6                 | 0.6                 | 2.5             | 62.7                       |
| Unidentified Cryptophyceae > 10 μm <sup>+</sup>                 | 4.9                 | 4.3                 | 2.5             | 65.2                       |
| Unidentified phytoplankton > 10 μm                              | 0.2                 | 0.9                 | 2.2             | 67.4                       |
| <i>Navicula</i> spp. <sup>Δ</sup>                               | 0.3                 | 0.8                 | 2.2             | 69.6                       |

---

**Supplementary Table S12** – Summary of the results of the similarity percentage (SIMPER) analysis, applied to the dissimilarity in the structure of phytoplankton assemblages during two seasons in the Ria Formosa lagoon (Autumn and Spring), during the period September 2018 - September 2020. For each phytoplankton taxa, the mean abundance for the two seasons (log (cells L<sup>-1</sup> + 1)), and the percentage contribution to the overall dissimilarity between stations (Contrib.) are provided. The cumulative percentage contribution (Cumulative contrib.), representing the sum of the individual contributions, shows how total dissimilarity is built up by the contributing species. Only the taxonomic entities that explained up to 70% of the cumulative dissimilarity are shown. Symbols next to each taxa represent different phytoplankton groups, including diatoms or specific phyla: <sup>Δ</sup> – Diatoms; <sup>°</sup> – Dinoflagellata; <sup>^</sup> – Euglenophyta; <sup>□</sup> – Cyanobacteriota; <sup>+</sup> - Cryptista; <sup>\*</sup> – Chlorophyta; <sup>•</sup> - Haptophyta.

**SIMPER overall average dissimilarity = 56.4 %**

| Phytoplankton taxa                                       | Abundance<br>Autumn | Abundance<br>Spring | Contrib.<br>(%) | Cumulative<br>contrib. (%) |
|----------------------------------------------------------|---------------------|---------------------|-----------------|----------------------------|
| <i>Chaetoceros</i> spp. <sup>Δ</sup>                     | 1.5                 | 4.0                 | 5.5             | 5.5                        |
| <i>Kryptoperidinium foliaceum</i> <sup>°</sup>           | 0.8                 | 3.6                 | 5.4             | 10.9                       |
| Unidentified Pennales > 10 μm <sup>Δ</sup>               | 1.6                 | 3.9                 | 4.1             | 15.1                       |
| <i>Eutreptiella</i> spp. <sup>^</sup>                    | 3.0                 | 1.8                 | 3.8             | 18.9                       |
| Unidentified Oscillatoriales <sup>□</sup>                | 1.3                 | 1.8                 | 3.7             | 22.6                       |
| Unidentified Gymnodiniales < 20 μm <sup>°</sup>          | 1.7                 | 3.3                 | 3.3             | 25.9                       |
| Unidentified Cryptophyceae < 10 μm <sup>+</sup>          | 4.9                 | 6.3                 | 3.3             | 29.2                       |
| Unidentified phytoplankton > 10 μm                       | 0.2                 | 1.8                 | 3.3             | 32.5                       |
| Unidentified Pennales < 10 μm <sup>Δ</sup>               | 0.7                 | 1.8                 | 3.1             | 35.6                       |
| Unidentified Chlorophyte 1 <sup>*</sup>                  | 3.3                 | 3.4                 | 3.0             | 38.6                       |
| Unidentified Gymnodiniales > 20 μm <sup>°</sup>          | 1.3                 | 1.3                 | 2.9             | 41.5                       |
| <i>Pseudo-nitzschia delicatissima</i> group <sup>Δ</sup> | 1.5                 | 1.1                 | 2.9             | 44.4                       |
| <i>Navicula</i> spp. <sup>Δ</sup>                        | 0.3                 | 1.8                 | 2.8             | 47.2                       |
| <i>Heterocapsa</i> spp. <sup>°</sup>                     | 0.3                 | 1.6                 | 2.7             | 49.9                       |
| Unidentified Coccolithophores <sup>•</sup>               | 2.1                 | 2.7                 | 2.7             | 52.6                       |
| <i>Skeletonema</i> sp. <sup>Δ</sup>                      | 1.7                 | 0.0                 | 2.5             | 55.1                       |
| <i>Guinardia delicatula</i> <sup>Δ</sup>                 | 1.1                 | 0.8                 | 2.4             | 57.5                       |
| <i>Cylindrotheca closterium</i> <sup>Δ</sup>             | 1.1                 | 1.8                 | 2.4             | 59.9                       |
| <i>Pseudo-nitzschia seriata</i> group <sup>Δ</sup>       | 0.7                 | 1.2                 | 2.4             | 62.3                       |
| Unidentified centric forms <sup>Δ</sup>                  | 0.7                 | 1.3                 | 2.4             | 64.6                       |
| Unidentified Cryptophyceae > 10 μm <sup>+</sup>          | 4.9                 | 4.2                 | 2.3             | 67.0                       |
| Amphidomataceae/ <i>Heterocapsa</i> sp. <sup>°</sup>     | 0.9                 | 1.1                 | 2.2             | 69.2                       |

**Supplementary Table S13** – Summary of the results of the similarity percentage (SIMPER) analysis, applied to the dissimilarity in the structure of phytoplankton assemblages during two seasons in the Ria Formosa lagoon (Winter and Spring), during the period September 2018 - September 2020. For each phytoplankton taxa, the mean abundance for the two seasons (log (cells L<sup>-1</sup> + 1)), and the percentage contribution to the overall dissimilarity between stations (Contrib.) are provided. The cumulative percentage contribution (Cumulative contrib.), representing the sum of the individual contributions, shows how total dissimilarity is built up by the contributing species. Only the taxonomic entities that explained up to 70% of the cumulative dissimilarity are shown. Symbols next to each taxa represent different phytoplankton groups, including diatoms or specific phyla: <sup>Δ</sup> – Diatoms; <sup>+</sup> – Cryptista; <sup>°</sup> – Dinoflagellata; <sup>\*</sup> – Chlorophyta; <sup>□</sup> – Cyanobacteriota; <sup>•</sup> – Haptophyta; <sup>^</sup> - Euglenophyta.

---

**SIMPER overall average dissimilarity = 60.8 %**

---

| Phytoplankton taxa                              | Abundance<br>Winter | Abundance<br>Spring | Contrib.<br>(%) | Cumulative<br>contrib. (%) |
|-------------------------------------------------|---------------------|---------------------|-----------------|----------------------------|
| <i>Chaetoceros</i> spp. <sup>Δ</sup>            | 1.0                 | 4.0                 | 5.6             | 5.6                        |
| Unidentified Cryptophyceae < 10 μm <sup>+</sup> | 3.5                 | 6.3                 | 5.3             | 10.9                       |
| <i>Kryptoperidinium foliaceum</i> <sup>°</sup>  | 1.4                 | 3.6                 | 5.2             | 16.1                       |
| Unidentified Chlorophyte 1 <sup>*</sup>         | 1.5                 | 3.4                 | 4.0             | 20.1                       |
| Unidentified Gymnodiniales < 20 μm <sup>°</sup> | 1.0                 | 3.3                 | 4.0             | 24.1                       |
| Unidentified Oscillatoriales <sup>□</sup>       | 1.1                 | 1.8                 | 3.6             | 27.7                       |
| Unidentified Pennales > 10 μm <sup>Δ</sup>      | 2.2                 | 3.9                 | 3.3             | 31.1                       |
| Unidentified phytoplankton > 10 μm              | 0.9                 | 1.8                 | 3.3             | 34.3                       |
| Unidentified Coccolithophores <sup>•</sup>      | 1.7                 | 2.7                 | 3.2             | 37.5                       |
| <i>Eutreptiella</i> spp. <sup>^</sup>           | 0.6                 | 1.8                 | 3.0             | 40.5                       |
| Unidentified Pennales < 10 μm <sup>Δ</sup>      | 1.1                 | 1.8                 | 2.8             | 43.3                       |
| <i>Navicula</i> spp. <sup>Δ</sup>               | 0.8                 | 1.8                 | 2.7             | 46.1                       |
| <i>Heterocapsa</i> spp. <sup>°</sup>            | 0.6                 | 1.6                 | 2.6             | 48.7                       |
| Unidentified Cryptophyceae > 10 μm <sup>+</sup> | 4.3                 | 4.2                 | 2.5             | 51.2                       |
| Unidentified Gymnodiniales > 20 μm <sup>°</sup> | 0.2                 | 1.3                 | 2.3             | 53.5                       |
| Unidentified Euglenophyceae <sup>^</sup>        | 0.5                 | 1.2                 | 2.3             | 55.8                       |
| Unidentified centric forms <sup>Δ</sup>         | 0.4                 | 1.3                 | 2.3             | 58.0                       |
| <i>Leptocylindrus danicus</i> <sup>Δ</sup>      | 0.2                 | 1.2                 | 2.2             | 60.2                       |
| Unidentified Chlorophyceae <sup>*</sup>         | 0.5                 | 1.0                 | 2.1             | 62.3                       |
| Unidentified Cyanophyceae <sup>□</sup>          | 0.0                 | 1.4                 | 2.1             | 64.5                       |
| <i>Skeletonema costatum</i> <sup>Δ</sup>        | 1.3                 | 0.0                 | 2.1             | 66.5                       |
| <i>Cylindrotheca closterium</i> <sup>Δ</sup>    | 1.8                 | 1.8                 | 2.0             | 68.6                       |

---
